# Supplementary material for: High-performance Na–CO2batteries with ZnCo2O4@CNT as the cathode catalyst
Source: Royal Society of Chemistry journal article supplement (doi:10.1039/d0ta09235e), 2020-01-01
Supplement: d0ta09235e1.pdf [file d0ta09235e1.pdf]

## High-performance Na–CO<sub>2</sub> Batteries with ZnCo<sub>2</sub>O<sub>4</sub>@CNT as Cathode Catalyst

Subashchandrabose Thoka,<sup>a</sup> Zizheng Tong,<sup>b</sup> Anirudha Jena,<sup>b,c</sup> Tai-Feng Hung,<sup>d</sup> Ching-Chen Wu,<sup>d</sup> Wen-Sheng Chang,<sup>d</sup> Fu-Ming Wang,<sup>e,f,g,h</sup> Xing-Chun Wang,<sup>e</sup> Li-Chang Yin,<sup>\*,i</sup> Ho Chang,<sup>\*,c</sup> Shu-Fen Hu,<sup>\*,a</sup> and Ru-Shi Liu<sup>\*,b</sup>

<sup>a</sup>*Department of Physics, National Taiwan Normal University, Taipei 116, Taiwan*

<sup>b</sup>*Department of Chemistry, National Taiwan University, Taipei 106, Taiwan*

<sup>c</sup>*Department of Mechanical Engineering and Graduate Institute of Manufacturing Technology, National Taipei University of Technology, Taipei 106, Taiwan*

<sup>d</sup>*Green Energy & Environment Research Laboratories, Industrial Technology Research Institute, Hsinchu 31040, Taiwan*

<sup>e</sup>*Graduate Institute of Applied Science and Technology, National Taiwan University of Science and Technology, Taipei 10607, Taiwan*

<sup>f</sup>*Sustainable Energy Center, National Taiwan University of Science and Technology, Taipei 10607, Taiwan*

<sup>g</sup>*Department of Chemical Engineering, Chung Yuan Christian University, Taoyuan 32023, Taiwan*

<sup>h</sup>*R&D Center for Membrane Technology, Chung Yuan Christian University, Taoyuan 32023, Taiwan*

<sup>i</sup>*Shenyang National Laboratory for Materials Science, Institute of Metal Research, Chinese Academy of Sciences, Shenyang 110016, China*

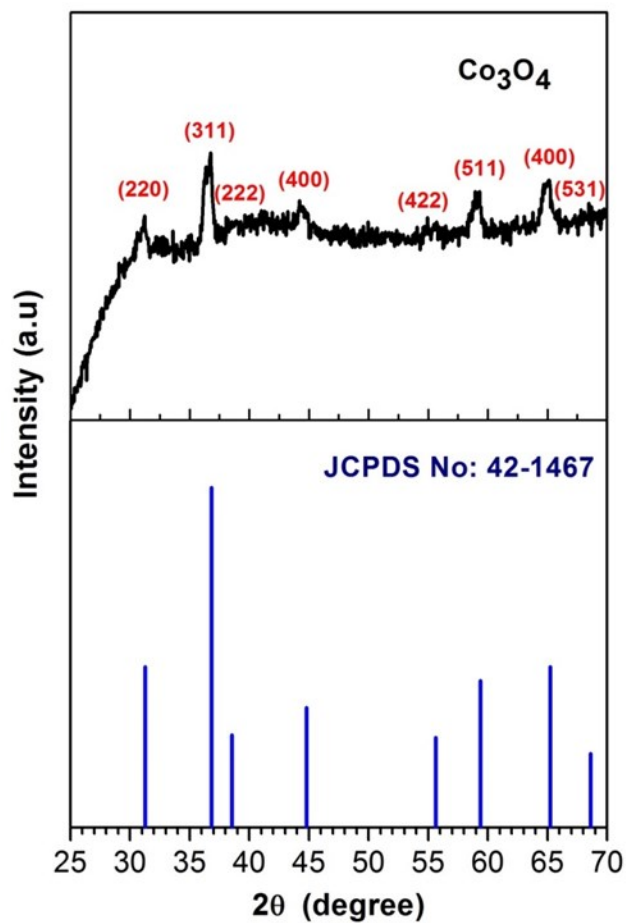

**Fig. S1.** XRD pattern of the porous  $\text{Co}_3\text{O}_4$  nanorods.

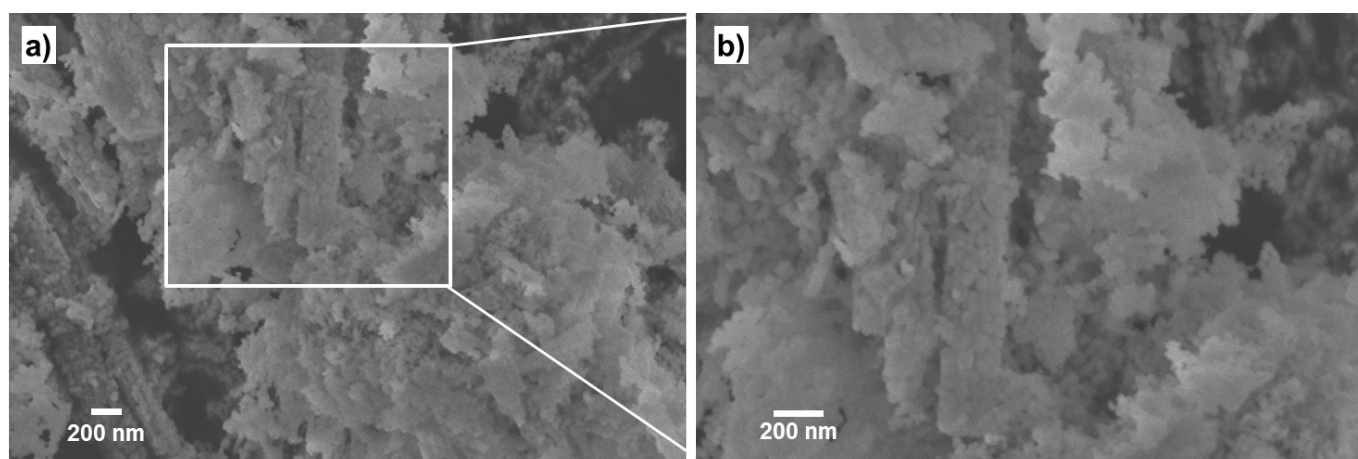

**Fig. S2.** SEM images of the porous  $\text{Co}_3\text{O}_4$  nanorods at (a) low and (b) high magnifications.

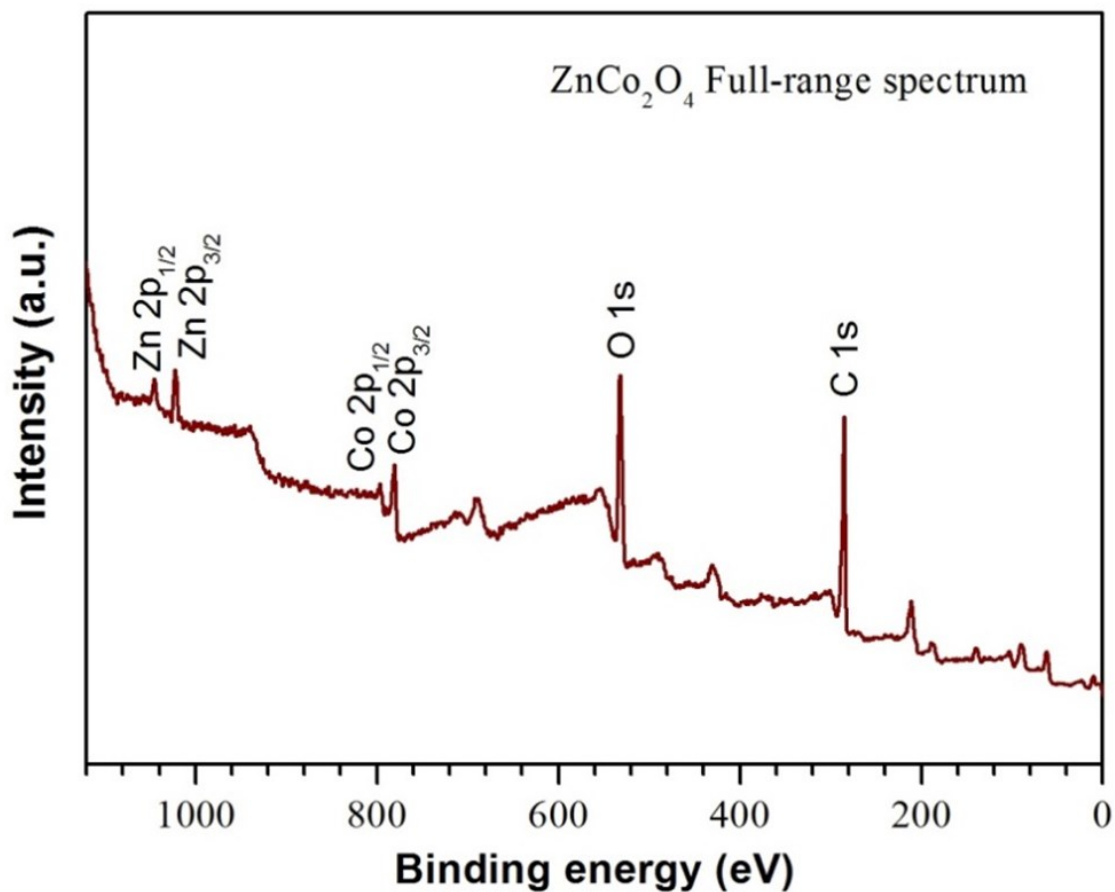

**Fig. S3.** Survey XPS spectrum of the as-synthesized  $\text{ZnCo}_2\text{O}_4$  porous nanorods.

| Samples | Absorption edge | Path  | R (Å)   | CN      | $\sigma^2$ (Å <sup>2</sup> ) | R factor |
|---------|-----------------|-------|---------|---------|------------------------------|----------|
| Co      | Co K-edge       | Co–O  | 1.92(2) | 3.3(2)  | 0.000(0)                     | 0.01749  |
|         |                 | Co–Co | 2.87(8) | 6.7(6)  | 0.008(2)                     |          |
| Zn      | Zn K-edge       | Zn–O  | 1.95(0) | 2.9(5)  | 0.004(4)                     | 0.00526  |
|         |                 | Zn–Co | 3.35(5) | 10.2(4) | 0.009(8)                     |          |

**Table S1.** Fitting results of Co and Zn K-edge EXAFS signals for the  $\text{ZnCo}_2\text{O}_4$ @CNT pristine electrode.

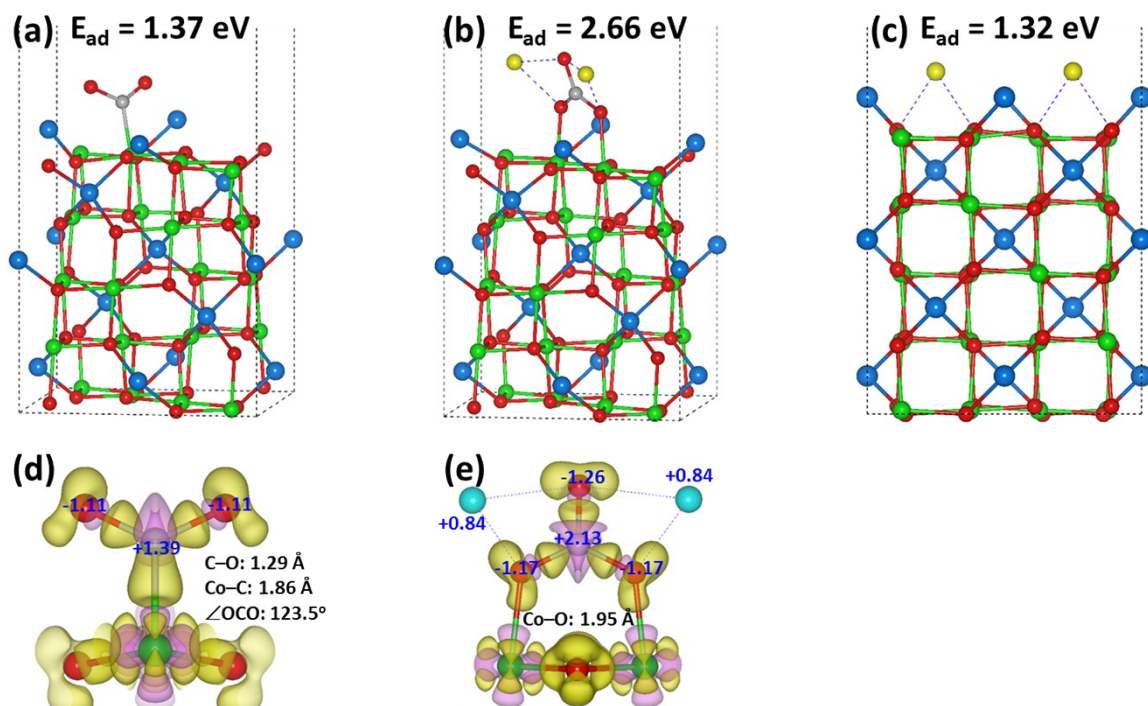

**Fig. S4.** Schematic structures of (a) CO<sub>2</sub>, (b) Na<sub>2</sub>CO<sub>3</sub> cluster, and (c) Na atom adsorption on the ZnCo<sub>2</sub>O<sub>4</sub> (001) surface with exposed Co and Zn atoms. The Zn, Co, O, C, and Na atoms are denoted by the blue, green, red, grey, and yellow balls, respectively. (d and e) Charge density plots of CO<sub>2</sub> and Na<sub>2</sub>CO<sub>3</sub> on the ZnCo<sub>2</sub>O<sub>4</sub> (001) surface with adsorption configurations shown in (a) and (b), respectively. The iso-surface level is set to be 0.02 e/Å<sup>3</sup>. The yellow and purple regions represent the charge accumulation and depletion, respectively. In (e), the Na atoms are denoted by light blue balls for clarity. The relevant bond length (in Å), bond angle, and charge population (in blue text) of the CO<sub>2</sub> molecule and Na<sub>2</sub>CO<sub>3</sub> cluster after adsorption are presented.

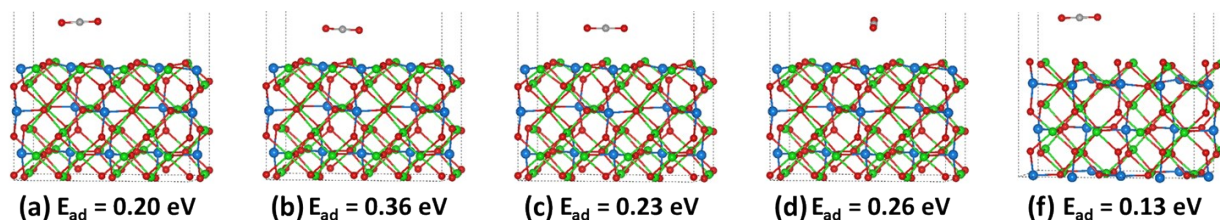

**Fig. S5.** (a–d) Fully relaxed structures of CO<sub>2</sub> on ZnCo<sub>2</sub>O<sub>4</sub> with different adsorption configurations for the (110) surface with exposed Co and Zn atoms. (e) Fully relaxed structures of CO<sub>2</sub> on the ZnCo<sub>2</sub>O<sub>4</sub> (110) surface with only exposed Co atoms. The Zn, Co, O, and C atoms are denoted by the blue, green, red, and grey balls, respectively.

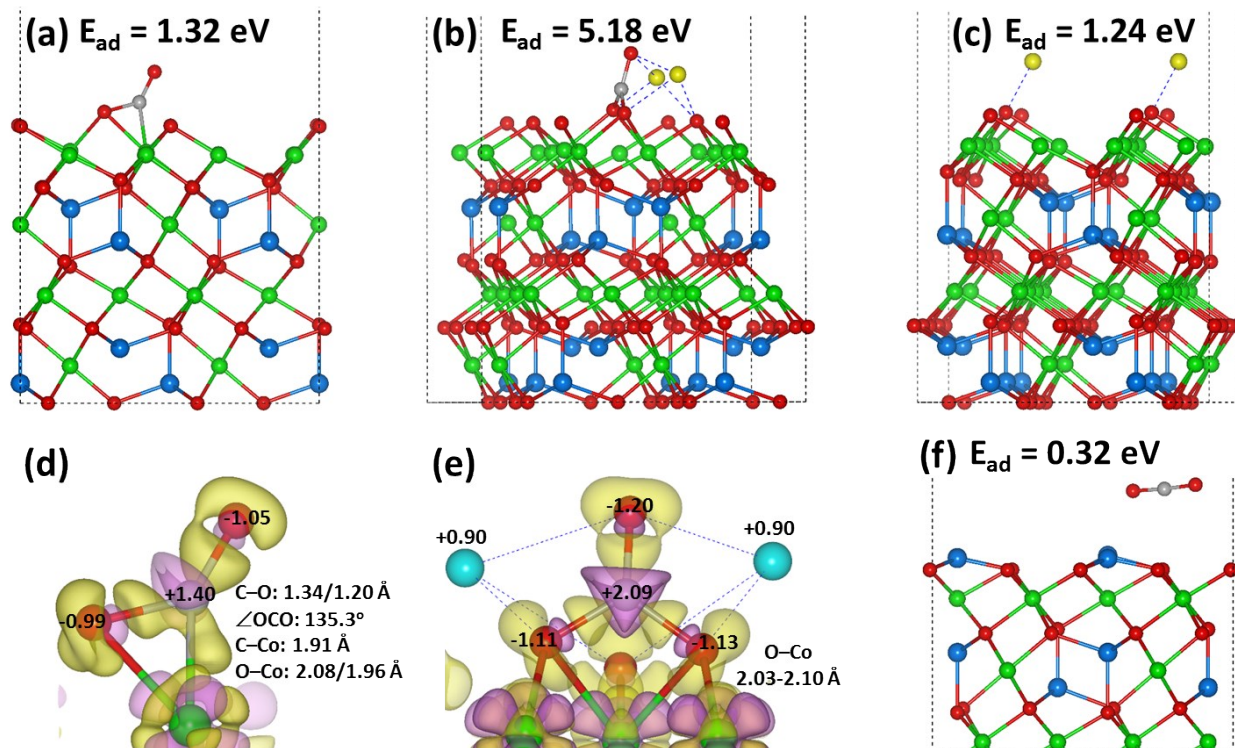

**Fig. S6.** Schematic structures of (a) CO<sub>2</sub>, (b) Na<sub>2</sub>CO<sub>3</sub> cluster, and (c) Na atom adsorption on the ZnCo<sub>2</sub>O<sub>4</sub> (111) surface with only exposed Co atoms. The Zn, Co, O, C, and Na atoms are denoted by the blue, green, red, grey, and yellow balls, respectively. (d and e) Charge density plots of CO<sub>2</sub> and Na<sub>2</sub>CO<sub>3</sub> on the ZnCo<sub>2</sub>O<sub>4</sub> (111) surface with adsorption configurations shown in (a) and (b), respectively. The iso-surface level is set to be 0.02 e/Å<sup>3</sup>. The yellow and purple regions represent the charge accumulation and depletion, respectively. In (e), the Na atoms are denoted by the light blue balls for clarity. (f) Schematic structures of CO<sub>2</sub> adsorption on the ZnCo<sub>2</sub>O<sub>4</sub> (111) surface with only exposed Zn atoms. The relevant bond length (in Å), bond angle, and charge population (in blue text) of the CO<sub>2</sub> molecule and Na<sub>2</sub>CO<sub>3</sub> cluster after adsorption are presented.

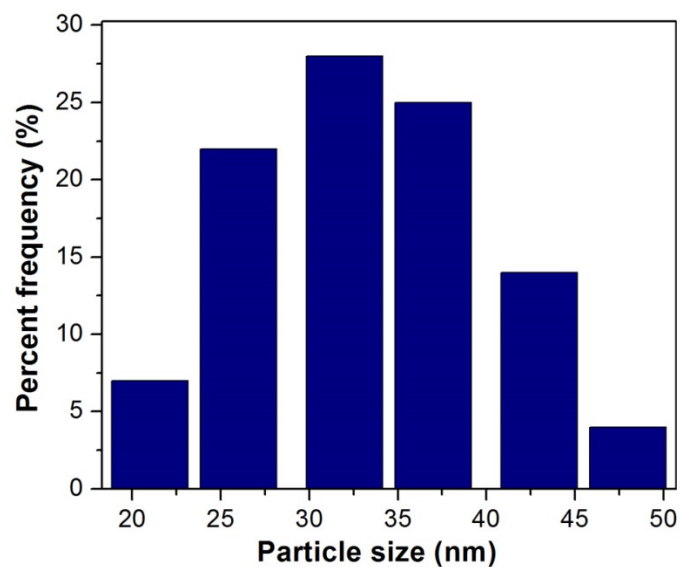

**Figure S7.** Particle size distribution histogram of nanoparticles composed in  $\text{ZnCo}_2\text{O}_4$  nanorods.

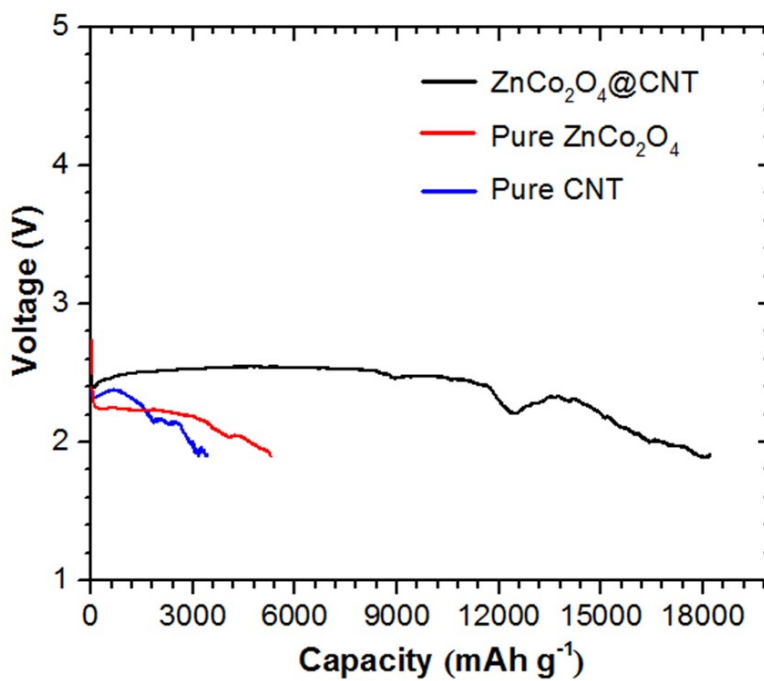

**Figure S8.** Full discharge curves of  $\text{ZnCo}_2\text{O}_4\text{@CNT}$ , pure  $\text{ZnCo}_2\text{O}_4$ , and pure CNT cathode materials in Na- $\text{CO}_2$  batteries under the cut-off voltage of 1.9 V and the current density of  $100 \text{ mA g}^{-1}$ .

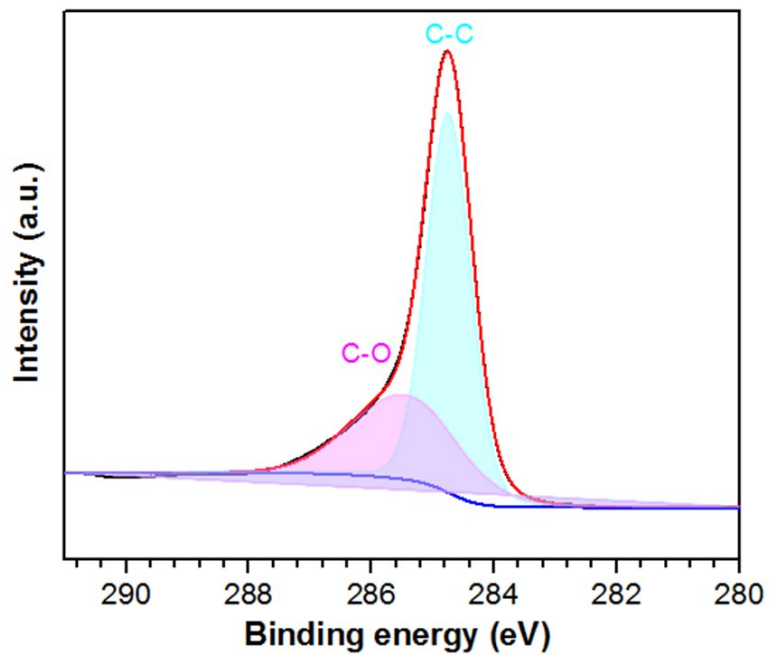

**Figure S9.** C 1s high-resolution X-ray photoelectron spectra of the pristine ZnCo<sub>2</sub>O<sub>4</sub>@CNT cathode.

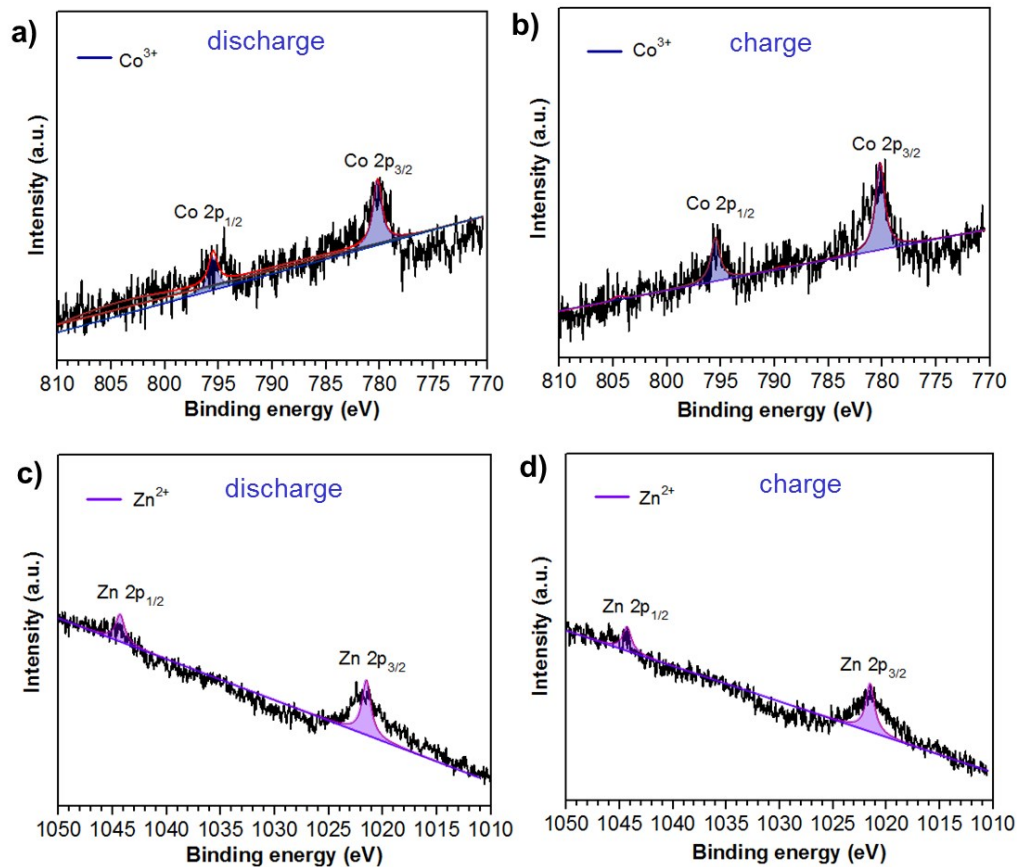

**Figure S10.** High-resolution X-ray photoelectron spectra of Co 2p and Zn 2p of the porous ZnCo<sub>2</sub>O<sub>4</sub> nanorods at different stages. (a, c) discharged state, and (b, d) charged state in the Na-CO<sub>2</sub> batteries at 100 mA g<sup>-1</sup> under the limited capacity of 500 mAh g<sup>-1</sup>.



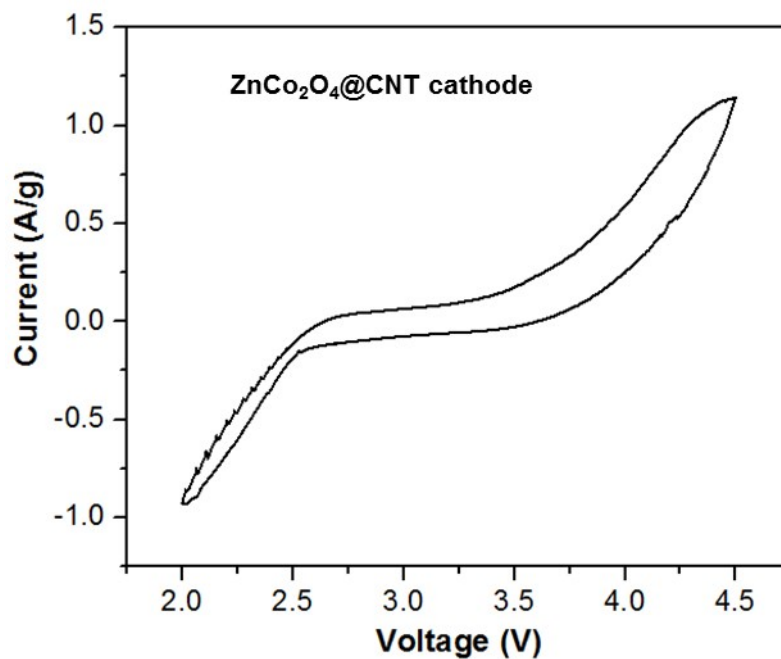

**Figure S11.** Cyclic voltammety curves of Na–CO<sub>2</sub> battery with ZnCo<sub>2</sub>O<sub>4</sub>@CNT cathode operating between 2–4.5V at a scan rate of 0.1 mVs<sup>-1</sup>.
